# Supplementary material for: Glaucoma incidence risk in a cohort of Mayak PA workers occupationally exposed to ionizing radiation
Source: PubMed Central journal article supplement (PMC6713741; doi:10.1038/s41598-019-48915-6), 2019-08-28
Supplement: 41598_2019_48915_MOESM1_ESM.pdf [file 41598_2019_48915_MOESM1_ESM.pdf]

Glaucoma incidence risk in a cohort of Mayak PA workers occupationally exposed to ionizing radiation

Evgeny V. Bragin<sup>1</sup>, Tamara V. Azizova<sup>1</sup>, Maria V. Bannikova<sup>1</sup>, Evgeniya S. Grigoryeva<sup>1</sup> & Nobuyuki Hamada<sup>2</sup>

<sup>1</sup>Southern Urals Biophysics Institute (SUBI), Ozyorskoe Shosse 19, Ozyorsk Chelyabinsk Region, 456780, Russia.

<sup>2</sup>Radiation Safety Research Center, Nuclear Technology Research Laboratory, Central Research Institute of Electric Power Industry (CRIEPI), 2-11-1 Iwado-kita, Komae, Tokyo 201-8511, Japan. Correspondence and requests for materials should be addressed to T.V.A. (email: [clinic@subi.su](mailto:clinic@subi.su))

**Supplementary Table S1. Study cohort characteristics.**

| <i>Distribution of workers by age at first employment at the facility</i>                     |        |        |         |        |            |        |
|-----------------------------------------------------------------------------------------------|--------|--------|---------|--------|------------|--------|
| Age at first employment, years                                                                | Males  |        | Females |        | Both sexes |        |
|                                                                                               | Number | %      | Number  | %      | Number     | %      |
| <20                                                                                           | 5399   | 32.36  | 771     | 13.54  | 6170       | 27.58  |
| 20–24                                                                                         | 5863   | 35.13  | 2000    | 35.16  | 7863       | 35.14  |
| 25–29                                                                                         | 2607   | 15.62  | 1108    | 19.48  | 3715       | 16.60  |
| 30–34                                                                                         | 1103   | 6.61   | 632     | 11.11  | 1735       | 7.75   |
| 35–39                                                                                         | 816    | 4.89   | 608     | 10.69  | 1424       | 6.36   |
| ≥40                                                                                           | 900    | 5.39   | 570     | 10.02  | 1470       | 6.57   |
| Total                                                                                         | 16688  | 100.00 | 5689    | 100.00 | 22377      | 100.00 |
| <i>Distribution of workers by period of first employment</i>                                  |        |        |         |        |            |        |
| Period of first employment                                                                    | Males  |        | Females |        | Both sexes |        |
|                                                                                               | Number | %      | Number  | %      | Number     | %      |
| 1948–1953                                                                                     | 5485   | 32.86  | 2921    | 51.34  | 8406       | 37.56  |
| 1954–1958                                                                                     | 3233   | 19.37  | 658     | 11.57  | 3891       | 17.38  |
| 1959–1963                                                                                     | 3221   | 19.30  | 616     | 10.83  | 3837       | 17.15  |
| 1964–1968                                                                                     | 1370   | 8.21   | 348     | 6.12   | 1718       | 7.68   |
| 1969–1972                                                                                     | 827    | 4.96   | 224     | 3.94   | 1051       | 4.70   |
| 1973–1978                                                                                     | 1770   | 10.61  | 601     | 10.56  | 2371       | 10.60  |
| 1979–1982                                                                                     | 782    | 4.69   | 321     | 5.64   | 1103       | 4.93   |
| Total                                                                                         | 16688  | 100.00 | 5689    | 100.00 | 22377      | 100.00 |
| <i>Distribution of workers by age as of the date of primary glaucoma diagnosis</i>            |        |        |         |        |            |        |
| Age at diagnosis, years                                                                       | Males  |        | Females |        | Both sexes |        |
|                                                                                               | Number | %      | Number  | %      | Number     | %      |
| <50                                                                                           | 17     | 5.40   | 7       | 4.35   | 24         | 5.04   |
| 50–59                                                                                         | 68     | 21.59  | 11      | 6.83   | 79         | 16.60  |
| 60–69                                                                                         | 148    | 46.98  | 63      | 39.13  | 211        | 44.33  |
| 70–79                                                                                         | 73     | 23.17  | 68      | 42.24  | 141        | 29.62  |
| ≥80                                                                                           | 9      | 2.86   | 12      | 7.45   | 21         | 4.41   |
| Total                                                                                         | 315    | 100.00 | 161     | 100.00 | 476        | 100.00 |
| <i>Distribution of workers by age as of the date of primary open-angle glaucoma diagnosis</i> |        |        |         |        |            |        |
| Age at diagnosis, years                                                                       | Males  |        | Females |        | Both sexes |        |
|                                                                                               | Number | %      | Number  | %      | Number     | %      |
| <50                                                                                           | 16     | 5.21   | 5       | 3.25   | 21         | 4.55   |
| 50–59                                                                                         | 67     | 21.82  | 9       | 5.84   | 76         | 16.49  |
| 60–69                                                                                         | 145    | 47.23  | 63      | 40.91  | 208        | 45.12  |
| 70–79                                                                                         | 71     | 23.13  | 64      | 41.56  | 135        | 29.28  |
| ≥80                                                                                           | 8      | 2.61   | 13      | 8.44   | 21         | 4.56   |
| Total                                                                                         | 307    | 100.00 | 154     | 100.00 | 461        | 100.00 |
| <i>Distribution of workers by age at the end of the follow-up</i>                             |        |        |         |        |            |        |
| Age at the end of the follow-up, years                                                        | Males  |        | Females |        | Both sexes |        |
|                                                                                               | Number | %      | Number  | %      | Number     | %      |
| <40                                                                                           | 6761   | 40.51  | 1694    | 29.78  | 8455       | 37.78  |
| 40–49                                                                                         | 1767   | 10.59  | 370     | 6.50   | 2137       | 9.55   |
| 50–59                                                                                         | 3016   | 18.07  | 714     | 12.55  | 3730       | 16.67  |
| 60–69                                                                                         | 2735   | 16.39  | 915     | 16.08  | 3650       | 16.31  |
| ≥70                                                                                           | 2409   | 14.44  | 1996    | 35.09  | 4405       | 19.69  |
| Total                                                                                         | 16688  | 100.00 | 5689    | 100.00 | 22377      | 100.00 |
| <i>Distribution of workers by duration of employment at one of the main facilities</i>        |        |        |         |        |            |        |
| Employment duration, years                                                                    | Males  |        | Females |        | Both sexes |        |
|                                                                                               | Number | %      | Number  | %      | Number     | %      |
| <1                                                                                            | 839    | 5.03   | 217     | 3.81   | 1056       | 4.72   |
| 1–10                                                                                          | 6149   | 36.85  | 2012    | 35.37  | 8161       | 36.47  |

|                                                                                                                       |        |        |         |        |            |        |
|-----------------------------------------------------------------------------------------------------------------------|--------|--------|---------|--------|------------|--------|
| ≥10                                                                                                                   | 9700   | 58.12  | 3460    | 60.82  | 13160      | 58.81  |
| Total                                                                                                                 | 16688  | 100.00 | 5689    | 100.00 | 22377      | 100.00 |
| <i>Distribution of workers by cumulative brain absorbed dose from external <math>\gamma</math>-rays</i>               |        |        |         |        |            |        |
| Cumulative external $\gamma$ -dose, Gy                                                                                | Males  |        | Females |        | Both sexes |        |
|                                                                                                                       | Number | %      | Number  | %      | Number     | %      |
| <0.25                                                                                                                 | 9518   | 57.03  | 3646    | 64.09  | 13164      | 58.83  |
| 0.25–0.5                                                                                                              | 2522   | 15.12  | 672     | 11.81  | 3194       | 14.27  |
| 0.5–1.0                                                                                                               | 2120   | 12.70  | 713     | 12.53  | 2833       | 12.66  |
| ≥1.0                                                                                                                  | 2528   | 15.15  | 658     | 11.57  | 3186       | 14.24  |
| Total                                                                                                                 | 16688  | 100.00 | 5689    | 100.00 | 22377      | 100.00 |
| <i>Distribution of workers by cumulative brain absorbed dose from neutrons</i>                                        |        |        |         |        |            |        |
| Cumulative neutron dose, Gy                                                                                           | Males  |        | Females |        | Both sexes |        |
|                                                                                                                       | Number | %      | Number  | %      | Number     | %      |
| Unmeasured 0.0                                                                                                        | 13213  | 79.18  | 5081    | 89.32  | 18294      | 81.75  |
| <0.001                                                                                                                | 2110   | 12.64  | 431     | 7.57   | 2541       | 11.36  |
| 0.001–0.005                                                                                                           | 1173   | 7.03   | 140     | 2.46   | 1313       | 5.87   |
| ≥0.005                                                                                                                | 192    | 1.15   | 37      | 0.65   | 229        | 1.02   |
| Total                                                                                                                 | 16688  | 100.00 | 5689    | 100.00 | 22377      | 100.00 |
| <i>Distribution of workers by the unweighted sum of cumulative brain absorbed <math>\gamma</math> + neutron doses</i> |        |        |         |        |            |        |
| Cumulative $\gamma$ + neutron dose, Gy                                                                                | Males  |        | Females |        | Both sexes |        |
|                                                                                                                       | Number | %      | Number  | %      | Number     | %      |
| <0.25                                                                                                                 | 9517   | 57.03  | 3646    | 64.09  | 13163      | 58.82  |
| 0.25–0.5                                                                                                              | 2521   | 15.11  | 672     | 11.81  | 3193       | 14.27  |
| 0.5–1.0                                                                                                               | 2116   | 12.68  | 713     | 12.53  | 2829       | 12.64  |
| ≥1.0                                                                                                                  | 2534   | 15.18  | 658     | 11.57  | 3192       | 14.27  |
| Total                                                                                                                 | 16688  | 100.00 | 5689    | 100.00 | 22377      | 100.00 |

**Supplementary Table S2.** Risk analysis results for primary glaucoma and POAG incidence in relation to non-radiation factors.

| Factors                                                                                                                 |                 | Total primary glaucoma   |                 |                | POAG                     |                 |                |
|-------------------------------------------------------------------------------------------------------------------------|-----------------|--------------------------|-----------------|----------------|--------------------------|-----------------|----------------|
|                                                                                                                         |                 | RR (95% CI)              | Number of cases | <i>p</i> value | RR (95% CI)              | Number of cases | <i>p</i> value |
| <i>RR for various calendar periods of glaucoma diagnosis date (compared to 2006–2008)</i>                               |                 |                          |                 |                |                          |                 |                |
| Males                                                                                                                   | 1948–1955       | –                        | 0               | –              | –                        | 0               | –              |
|                                                                                                                         | 1956–1965       | –                        | 0               | –              | –                        | 0               | –              |
|                                                                                                                         | 1966–1975       | <b>0.20 (0.04, 0.92)</b> | 4               | <b>0.046</b>   | <b>0.13 (0.02, 0.67)</b> | 3               | <b>0.021</b>   |
|                                                                                                                         | 1976–1985       | 0.57 (0.22, 1.39)        | 32              | 0.221          | 0.48 (0.19, 1.21)        | 31              | 0.128          |
|                                                                                                                         | 1986–1995       | <b>0.52 (0.30, 0.91)</b> | 83              | <b>0.022</b>   | <b>0.47 (0.26, 0.82)</b> | 78              | <b>0.008</b>   |
|                                                                                                                         | 1996–2005       | <b>0.64 (0.43, 0.96)</b> | 143             | <b>0.031</b>   | <b>0.63 (0.42, 0.95)</b> | 143             | <b>0.027</b>   |
|                                                                                                                         | 2006–2008       | 1 (reference)            | 53              | –              | 1 (reference)            | 52              | –              |
| Females                                                                                                                 | 1948–1955       | –                        | 0               | –              | –                        | 0               | –              |
|                                                                                                                         | 1956–1965       | –                        | 0               | –              | –                        | 0               | –              |
|                                                                                                                         | 1966–1975       | 0.82 (0.09, 6.64)        | 7               | >0.50          | 1.62 (0.15, 18.41)       | 6               | >0.50          |
|                                                                                                                         | 1976–1985       | 0.95 (0.26, 3.41)        | 17              | >0.50          | 1.37 (0.36, 5.32)        | 13              | >0.50          |
|                                                                                                                         | 1986–1995       | <b>0.44 (0.19, 0.99)</b> | 30              | <b>0.049</b>   | 0.50 (0.22, 1.14)        | 31              | 0.097          |
|                                                                                                                         | 1996–2005       | 0.71 (0.41, 1.27)        | 79              | 0.233          | 0.76 (0.43, 1.38)        | 78              | 0.350          |
|                                                                                                                         | 2006–2008       | 1 (reference)            | 28              | –              | 1 (reference)            | 26              | –              |
| <i>RR for workers first employed at one of the main facilities in 1954 or later compared to those before 1954</i>       |                 |                          |                 |                |                          |                 |                |
| Males                                                                                                                   | 1948–1953       | 1 (reference)            | 115             | –              | 1 (reference)            | 109             | –              |
|                                                                                                                         | 1954–1958       | 0.98 (0.71, 1.36)        | 78              | >0.50          | 1.04 (0.74, 1.44)        | 78              | >0.50          |
|                                                                                                                         | 1959–1963       | 0.78 (0.54, 1.12)        | 61              | 0.182          | 0.81 (0.56, 1.16)        | 60              | 0.262          |
|                                                                                                                         | 1964–1968       | 0.78 (0.47, 1.24)        | 26              | 0.303          | 0.79 (0.47, 1.27)        | 25              | 0.347          |
|                                                                                                                         | 1969–1972       | 0.65 (0.29, 1.28)        | 9               | 0.248          | 0.69 (0.31, 1.36)        | 9               | 0.320          |
|                                                                                                                         | 1973–1978       | 1.09 (0.60, 1.88)        | 22              | >0.50          | 1.15 (0.63, 2.00)        | 22              | >0.50          |
|                                                                                                                         | 1979–1982       | 0.62 (0.18, 1.59)        | 4               | 0.374          | 0.65 (0.19, 1.69)        | 4               | 0.434          |
| Females                                                                                                                 | 1948–1953       | 1 (reference)            | 76              | –              | 1 (reference)            | 73              | –              |
|                                                                                                                         | 1954–1958       | 1.23 (0.77, 1.91)        | 26              | 0.365          | 1.28 (0.80, 1.98)        | 26              | 0.294          |
|                                                                                                                         | 1959–1963       | 0.97 (0.60, 1.52)        | 26              | >0.50          | 0.98 (0.60, 1.54)        | 25              | >0.50          |
|                                                                                                                         | 1964–1968       | 1.00 (0.49, 1.86)        | 11              | >0.50          | 0.93 (0.44, 1.77)        | 10              | >0.50          |
|                                                                                                                         | 1969–1972       | <b>0.30 (0.05, 0.97)</b> | 2               | <b>0.049</b>   | <b>0.31 (0.05, 0.99)</b> | 2               | <b>0.049</b>   |
|                                                                                                                         | 1973–1978       | 1.32 (0.68, 2.42)        | 16              | 0.398          | 1.17 (0.58, 2.21)        | 14              | >0.50          |
|                                                                                                                         | 1979–1982       | 0.99 (0.28, 2.72)        | 4               | >0.50          | 1.00 (0.28, 2.78)        | 4               | >0.50          |
| <i>RR for various groups of workers by age at first employment at the facility (compared to &lt;20 years old group)</i> |                 |                          |                 |                |                          |                 |                |
| Males                                                                                                                   | <20             | 1 (reference)            | 84              | –              | 1 (reference)            | 83              | –              |
|                                                                                                                         | 20–25           | 0.81 (0.59, 1.11)        | 110             | 0.185          | 0.81 (0.59, 1.11)        | 108             | 0.187          |
|                                                                                                                         | 25–30           | <b>0.68 (0.46, 0.99)</b> | 49              | <b>0.049</b>   | <b>0.65 (0.43, 0.96)</b> | 46              | <b>0.033</b>   |
|                                                                                                                         | 30–35           | 0.68 (0.42, 1.09)        | 29              | 0.116          | 0.67 (0.40, 1.07)        | 28              | 0.103          |
|                                                                                                                         | 35–40           | 0.60 (0.33, 1.03)        | 20              | 0.074          | 0.61 (0.34, 1.05)        | 20              | 0.086          |
|                                                                                                                         | ≥40             | 0.84 (0.47, 1.44)        | 23              | >0.50          | 0.85 (0.47, 1.46)        | 22              | >0.50          |
| Females                                                                                                                 | <20             | 1 (reference)            | 16              | –              | 1 (reference)            | 15              | –              |
|                                                                                                                         | 20–25           | 1.21 (0.68, 2.25)        | 50              | 0.370          | 1.28 (0.71, 2.43)        | 50              | 0.425          |
|                                                                                                                         | 25–30           | 1.12 (0.58, 2.20)        | 28              | 0.112          | 1.13 (0.58, 2.28)        | 27              | >0.50          |
|                                                                                                                         | 30–35           | 1.13 (0.56, 2.28)        | 21              | 0.207          | 1.13 (0.56, 2.34)        | 20              | >0.50          |
|                                                                                                                         | 35–40           | 1.04 (0.53, 2.08)        | 22              | 0.111          | 1.05 (0.52, 2.14)        | 21              | >0.50          |
|                                                                                                                         | ≥40             | 1.04 (0.51, 2.14)        | 24              | 0.433          | 0.94 (0.44, 2.00)        | 21              | >0.50          |
| <i>RR for ever-smokers vs. never-smokers</i>                                                                            |                 |                          |                 |                |                          |                 |                |
| Males                                                                                                                   | Never-smoker    | 1 (reference)            | 75              | –              | 1 (reference)            | 74              | –              |
|                                                                                                                         | Ever-smokers    | 0.94 (0.73, 1.23)        | 239             | >0.50          | 0.93 (0.72, 1.22)        | 232             | >0.50          |
|                                                                                                                         | Unknown         | 0.46 (0.03, 2.08)        | 1               | 0.441          | 0.48 (0.03, 2.16)        | 1               | 0.463          |
| Females                                                                                                                 | Never-smoker    | 1 (reference)            | 152             | –              | 1 (reference)            | 146             | –              |
|                                                                                                                         | Ever-smokers    | 1.08 (0.46, 2.15)        | 7               | >0.50          | 1.13 (0.48, 2.24)        | 7               | >0.50          |
|                                                                                                                         | Unknown         | 0.56 (0.09, 1.78)        | 2               | 0.420          | 0.29 (0.02, 1.31)        | 1               | 0.219          |
| <i>RR for workers with smoking index above 0 compared to non-smokers</i>                                                |                 |                          |                 |                |                          |                 |                |
| Males                                                                                                                   | 0 (non-smokers) | 1 (reference)            | 75              | –              | 1 (reference)            | 74              | –              |
|                                                                                                                         | Unknown         | 0.80 (0.51, 1.22)        | 28              | 0.312          | 0.79 (0.50, 1.21)        | 27              | 0.285          |
|                                                                                                                         | <10             | 0.95 (0.59, 1.46)        | 26              | >0.50          | 0.96 (0.60, 1.48)        | 26              | >0.50          |
|                                                                                                                         | 10–20           | 1.08 (0.72, 1.59)        | 38              | >0.50          | 1.04 (0.69, 1.54)        | 36              | >0.50          |
|                                                                                                                         | ≥20             | 0.94 (0.71, 1.25)        | 148             | >0.50          | 0.93 (0.70, 1.24)        | 144             | >0.50          |
| Females                                                                                                                 | 0 (non-smokers) | 1 (reference)            | 152             | –              | 1 (reference)            | 146             | –              |
|                                                                                                                         | Unknown         | 0.61 (0.15, 1.62)        | 3               | 0.397          | 0.42 (0.07, 1.33)        | 2               | 0.228          |
|                                                                                                                         | <10             | 1.94 (0.59, 4.61)        | 4               | 0.194          | 2.06 (0.63, 4.90)        | 4               | 0.157          |
|                                                                                                                         | 10–20           | 0.95 (0.05, 4.27)        | 1               | >0.50          | 0.99 (0.06, 4.46)        | 1               | >0.50          |
|                                                                                                                         | ≥20             | 0.50 (0.03, 2.22)        | 1               | 0.485          | 0.51 (0.03, 2.27)        | 1               | 0.499          |

| <i>RR for workers drinking alcohol compared to never-drinkers</i>                                                                                                                                                |                |                   |     |       |                          |     |              |
|------------------------------------------------------------------------------------------------------------------------------------------------------------------------------------------------------------------|----------------|-------------------|-----|-------|--------------------------|-----|--------------|
| Males                                                                                                                                                                                                            | Never-drinkers | 1 (reference)     | 10  | –     | 1 (reference)            | 9   | –            |
|                                                                                                                                                                                                                  | Ever-drinkers  | 0.70 (0.39, 1.42) | 294 | 0.272 | 0.77 (0.42, 1.61)        | 287 | 0.432        |
|                                                                                                                                                                                                                  | Unknown        | 0.68 (0.29, 1.64) | 11  | 0.380 | 0.76 (0.32, 1.90)        | 11  | >0.50        |
| Females                                                                                                                                                                                                          | Never-drinkers | 1 (reference)     | 90  | –     | 1 (reference)            | 87  | –            |
|                                                                                                                                                                                                                  | Ever-drinkers  | 1.11 (0.80, 1.54) | 68  | >0.50 | 1.10 (0.80, 1.53)        | 65  | >0.50        |
|                                                                                                                                                                                                                  | Unknown        | 0.42 (0.10, 1.12) | 3   | 0.138 | <b>0.29 (0.05, 0.92)</b> | 2   | <b>0.049</b> |
| <i>RR for workers with vs. without cataract removal surgery</i>                                                                                                                                                  |                |                   |     |       |                          |     |              |
| Males                                                                                                                                                                                                            | No surgery     | 1 (reference)     | 296 | –     | 1 (reference)            | 289 | –            |
|                                                                                                                                                                                                                  | After surgery  | 1.57 (0.94, 2.47) | 19  | 0.069 | 1.53 (0.90, 2.43)        | 18  | 0.093        |
| Females                                                                                                                                                                                                          | No surgery     | 1 (reference)     | 152 | –     | 1 (reference)            | 145 | –            |
|                                                                                                                                                                                                                  | After surgery  | 1.29 (0.60, 2.44) | 9   | 0.465 | 1.33 (0.62, 2.52)        | 9   | 0.415        |
| <i>Notes: Bold font, p &lt;0.05. CI, confidence interval estimated using the profile likelihood. POAG, primary open-angle glaucoma. RR, relative risk. p values are given, assessed via the Wald statistics.</i> |                |                   |     |       |                          |     |              |

## Supplementary statistical analysis

Hypertension was assigned when both systolic blood pressure was  $>140$  mmHg and diastolic blood pressure was  $>90$  mmHg. Hypertension was taken into account as a qualitative parameter categorized as 'unknown', 'hypertension-free' and 'hypertension'. BMI was estimated as body weight (kg) divided by squared height ( $m^2$ ), and was taken into account as a qualitative parameter categorized as 'unknown', 'below normal', 'normal', 'above normal' and 'obese'. BMI  $<18.5$   $kg\ m^{-2}$  was referred as body weight deficit; BMI  $18.5$ – $24.9$   $kg\ m^{-2}$  was referred as a normal body weight; BMI  $25.0$ – $29.9$   $kg\ m^{-2}$  was referred as an excessive body weight; and BMI  $\geq 30$   $kg\ m^{-2}$  was referred as obesity. In the present study, we took into account BMI and hypertension registered at the first pre-employment medical health examination (before a person started working at the Mayak PA).

Data on smoking habits were taken into account over the entire follow-up period and estimated with qualitative and quantitative indices. The qualitative index included values 'unknown', 'never smoker', and 'ever smoker'. 'Never smoker' was assumed to be a worker who reported to have never smoked during a series of annual mandatory medical examinations. The quantitative index (referred to as the smoking index) was calculated as the mean number of cigarette packs smoked in a day times years of smoking. The smoking index was measured by pack-years, and for 'never-smokers' was equated to zero.

Data on alcohol consumption were taken into account over the entire follow-up period and estimated with a qualitative parameter with values 'unknown', 'ever drinker', and 'never drinker'. 'Never drinker' was assumed to be a worker who reported to have never drunk alcohol during a series of annual mandatory medical examinations.

Papers reporting glaucoma risks following chronic radiation exposure are very sparse. In our work, we compare findings observed in four studies (Table 5). All these studies used different analysis techniques. Kiuchi et al [1, 2] used generalized estimating equations (GEE) to find the association between glaucoma eye-specific prevalence and explanatory variables and assumed logistic models for eye-specific prevalence. Little et al [3] used Cox proportional hazards models for estimating risks for glaucoma and macular degeneration. Azizova et al (present study) used the Poisson regression for estimating excess relative risk per unit dose (ERR/Gy). Kiuchi et al. reported significant Odds ratio at 1 Gy for normal-tension glaucoma [1, 2]. Little et al [3] and Azizova et al (present study) did not find significant associations between radiation doses and glaucoma.

To avoid risk underestimation due to the selected analysis technique we performed an additional analysis using a logit regression. To perform this analysis the same set of individual data for the study cohort workers as for the Poisson regression based analysis (its results are described in the main paper) was used. The data were compiled as an event-count table using

DATAB module of EPICURE software [4]. All explanatory variables were taken into account at a date when a worker had exited the study, i.e. at the earliest date among the following: a date of the disease diagnosis, a date of death, 31 December 2008 for alive workers still residing in Ozyorsk, date of ‘the last medical information’ for workers-residents with an unknown vital status and for those who had left Ozyorsk). A unit of the analysis was a person rather than eyes. For both primary glaucoma and POAG the following models were used:

$$\ln\left(\frac{p}{1-p}\right) = \alpha_0 + \alpha_1 S + \alpha_2 SHyp + \alpha_3 SBMI + \alpha_4 SDm + \alpha_5 Age + \alpha_6 SBy + \beta D_\gamma \quad \text{Model 1}$$

$$\ln\left(\frac{p}{1-p}\right) = \alpha_0 + \alpha_1 S + \alpha_2 SHyp + \alpha_3 SBMI + \alpha_4 SDm + \alpha_5 Age + \alpha_6 SBy + \beta D_{neutron} \quad \text{Model 2}$$

$$\ln\left(\frac{p}{1-p}\right) = \alpha_0 + \alpha_1 S + \alpha_2 SHyp + \alpha_3 SBMI + \alpha_4 SDm + \alpha_5 Age + \alpha_6 SBy + \beta D_{\gamma+neutron} \quad \text{Model 3}$$

where  $Age = (age\ at\ follow\ up\ date - 65)/5$  ;  $By = (birth\ year - 1935)/5$  ;  $S$  is an indicator of sex,  $Hyp$  is an indicator of hypertension,  $BMI$  is an indicator of body mass index,  $Dm$  is an indicator of diabetes mellitus, and  $\alpha$  and  $\beta$  are regression parameters. Common odds ratio for a radiation exposure of 1 Gy is  $exp(\beta)$ , where  $\beta$  is an estimate of the dose-response parameter.

The GMBO module of the EPICURE software was used to run the analyses. Two-sided P values and 95% confidence intervals were based on the Wald statistics.

The results of the analysis are summarized in Table S3.

The analysis demonstrated that the results based on the logit regression are in good agreement with the results based on the Poisson regression.

**Table S3.** Odds Ratio of Various Risk Factors for Primary glaucoma and POAG.

| Analysis type                                                                  | Total primary glaucoma |                             | POAG                   |                             |
|--------------------------------------------------------------------------------|------------------------|-----------------------------|------------------------|-----------------------------|
|                                                                                | Odds ratio<br>(95% CI) | <i>p</i> value <sup>1</sup> | Odds ratio<br>(95% CI) | <i>p</i> value <sup>1</sup> |
| <b>Model 1<sup>2</sup></b>                                                     |                        |                             |                        |                             |
| Brain absorbed dose from external $\gamma$ -rays at 1 Gy                       | 1.04 (0.88, 1.19)      | > 0.50                      | 1.04 (0.89, 1.18)      | > 0.50                      |
| Sex (females vs. males)                                                        | 0.90 (0.17, 1.64)      | > 0.50                      | 0.89 (0.17, 1.61)      | > 0.50                      |
| Males, age at follow-up date (given per 5 years at reference age 65)           | 1.06 (1.02, 1.10)      | 0.003                       | 1.06 (1.02, 1.10)      | 0.003                       |
| Females, age at follow-up date (given per 5 years at reference age 65)         | 1.06 (1.00, 1.11)      | 0.036                       | 1.06 (1.00, 1.11)      | 0.033                       |
| Males, birth year (given per 5 years at reference year 1935)                   | 1.00 (0.96, 1.04)      | > 0.50                      | 1.00 (0.96, 1.04)      | > 0.50                      |
| Females, birth year (given per 5 years at reference year 1935)                 | 0.95 (0.87, 1.04)      | 0.261                       | 0.96 (0.87, 1.04)      | 0.302                       |
| Males, hypertension (yes vs. no)                                               | 0.96 (0.70, 1.22)      | > 0.50                      | 0.95 (0.70, 1.20)      | > 0.50                      |
| Females, hypertension (yes vs. no)                                             | 0.90 (0.39, 1.42)      | > 0.50                      | 0.91 (0.41, 1.42)      | > 0.50                      |
| Males, BMI (<18.5 kg m <sup>-2</sup> vs. 18.5–24.9 kg m <sup>-2</sup> )        | 0.91 (0.17, 1.65)      | > 0.50                      | 0.91 (0.17, 1.65)      | > 0.50                      |
| Males, BMI (25–29.9 kg m <sup>-2</sup> vs. 18.5–24.9 kg m <sup>-2</sup> )      | 0.92 (0.65, 1.20)      | > 0.50                      | 0.92 (0.64, 1.19)      | > 0.50                      |
| Males, BMI ( $\geq$ 30 kg m <sup>-2</sup> vs. 18.5–24.9 kg m <sup>-2</sup> )   | 1.07 (0.02, 2.12)      | > 0.50                      | 1.08 (0.03, 2.13)      | > 0.50                      |
| Females, BMI (<18.5 kg m <sup>-2</sup> vs. 18.5–24.9 kg m <sup>-2</sup> )      | 0.71 (-0.46, 1.88)     | > 0.50                      | 0.71 (-0.46, 1.87)     | > 0.50                      |
| Females, BMI (25–29.9 kg m <sup>-2</sup> vs. 18.5–24.9 kg m <sup>-2</sup> )    | 1.06 (0.63, 1.48)      | > 0.50                      | 1.02 (0.61, 1.44)      | > 0.50                      |
| Females, BMI ( $\geq$ 30 kg m <sup>-2</sup> vs. 18.5–24.9 kg m <sup>-2</sup> ) | 1.13 (0.31, 1.94)      | > 0.50                      | 1.09 (0.30, 1.88)      | > 0.50                      |
| Males, diabetes mellitus (yes vs. no)                                          | 1.09 (0.56, 1.63)      | > 0.50                      | 1.08 (0.55, 1.61)      | > 0.50                      |
| Females, diabetes mellitus (yes vs. no)                                        | 1.17 (0.54, 1.79)      | > 0.50                      | 1.17 (0.56, 1.79)      | > 0.50                      |
| <b>Model 2<sup>3</sup></b>                                                     |                        |                             |                        |                             |
| Brain absorbed dose from neutrons at 1 Gy                                      | 6.04 (-39.42, 51.51)   | > 0.50                      | 6.33 (-39.04, 51.70)   | > 0.50                      |
| Sex (females vs. males)                                                        | 0.90 (0.19, 1.60)      | > 0.50                      | 0.89 (0.19, 1.58)      | > 0.50                      |
| Males, age at follow-up date (given per 5 years at reference age 65)           | 1.06 (1.02, 1.10)      | 0.002                       | 1.06 (1.02, 1.10)      | 0.002                       |
| Females, age at follow-up date (given per 5 years at reference age 65)         | 1.06 (1.01, 1.11)      | 0.029                       | 1.06 (1.01, 1.11)      | 0.026                       |
| Males, birth year (given per 5 years at reference year 1935)                   | 0.99 (0.96, 1.03)      | > 0.50                      | 1.00 (0.96, 1.03)      | > 0.50                      |
| Females, birth year (given per 5 years at reference year 1935)                 | 0.95 (0.87, 1.03)      | 0.222                       | 0.95 (0.87, 1.03)      | 0.261                       |
| Males, hypertension (yes vs. no)                                               | 0.96 (0.72, 1.21)      | > 0.50                      | 0.95 (0.71, 1.20)      | > 0.50                      |
| Females, hypertension (yes vs. no)                                             | 0.90 (0.41, 1.40)      | > 0.50                      | 0.91 (0.43, 1.40)      | > 0.50                      |
| Males, BMI (<18.5 kg m <sup>-2</sup> vs. 18.5–24.9 kg m <sup>-2</sup> )        | 0.91 (0.20, 1.62)      | > 0.50                      | 0.91 (0.21, 1.62)      | > 0.50                      |
| Males, BMI (25–29.9 kg m <sup>-2</sup> vs. 18.5–24.9 kg m <sup>-2</sup> )      | 0.92 (0.66, 1.19)      | > 0.50                      | 0.92 (0.65, 1.18)      | > 0.50                      |
| Males, BMI ( $\geq$ 30 kg m <sup>-2</sup> vs. 18.5–24.9 kg m <sup>-2</sup> )   | 1.06 (0.05, 2.07)      | > 0.50                      | 1.07 (0.06, 2.07)      | > 0.50                      |
| Females, BMI (<18.5 kg m <sup>-2</sup> vs. 18.5–24.9 kg m <sup>-2</sup> )      | 0.71 (-0.41, 1.82)     | > 0.50                      | 0.70 (-0.41, 1.81)     | > 0.50                      |
| Females, BMI (25–29.9 kg m <sup>-2</sup> vs. 18.5–24.9 kg m <sup>-2</sup> )    | 1.05 (0.65, 1.46)      | > 0.50                      | 1.02 (0.62, 1.42)      | > 0.50                      |



|                                                                                                                                                            |                    |        |                    |        |
|------------------------------------------------------------------------------------------------------------------------------------------------------------|--------------------|--------|--------------------|--------|
| Females, BMI ( $\geq 30$ kg m <sup>-2</sup> vs. 18.5–24.9 kg m <sup>-2</sup> )                                                                             | 1.12 (0.34, 1.90)  | > 0.50 | 1.08 (0.32, 1.84)  | > 0.50 |
| Males, diabetes mellitus (yes vs. no)                                                                                                                      | 1.09 (0.58, 1.61)  | > 0.50 | 1.08 (0.57, 1.59)  | > 0.50 |
| Females, diabetes mellitus (yes vs. no)                                                                                                                    | 1.16 (0.56, 1.76)  | > 0.50 | 1.17 (0.58, 1.76)  | > 0.50 |
| <b>Model 3<sup>2</sup></b>                                                                                                                                 |                    |        |                    |        |
| Unweighted sum of brain absorbed $\gamma$ + neutron dose at 1 Gy                                                                                           | 1.03 (0.88, 1.18)  | > 0.50 | 1.03 (0.89, 1.18)  | > 0.50 |
| Sex (females vs. males)                                                                                                                                    | 0.90 (0.17, 1.63)  | > 0.50 | 0.89 (0.17, 1.60)  | > 0.50 |
| Males, age at follow-up date (given per 5 years at reference age 65)                                                                                       | 1.06 (1.02, 1.10)  | 0.002  | 1.06 (1.02, 1.10)  | 0.003  |
| Females, age at follow-up date (given per 5 years at reference age 65)                                                                                     | 1.06 (1.00, 1.11)  | 0.035  | 1.06 (1.00, 1.11)  | 0.032  |
| Males, birth year (given per 5 years at reference year 1935)                                                                                               | 1.00 (0.96, 1.04)  | > 0.50 | 1.00 (0.96, 1.04)  | > 0.50 |
| Females, birth year (given per 5 years at reference year 1935)                                                                                             | 0.95 (0.87, 1.04)  | 0.268  | 0.96 (0.87, 1.04)  | 0.312  |
| Males, hypertension (yes vs. no)                                                                                                                           | 0.96 (0.70, 1.21)  | > 0.50 | 0.95 (0.70, 1.20)  | > 0.50 |
| Females, hypertension (yes vs. no)                                                                                                                         | 0.90 (0.39, 1.41)  | > 0.50 | 0.91 (0.41, 1.41)  | > 0.50 |
| Males, BMI (<18.5 kg m <sup>-2</sup> vs. 18.5–24.9 kg m <sup>-2</sup> )                                                                                    | 0.90 (0.17, 1.63)  | > 0.50 | 0.90 (0.17, 1.63)  | > 0.50 |
| Males, BMI (25–29.9 kg m <sup>-2</sup> vs. 18.5–24.9 kg m <sup>-2</sup> )                                                                                  | 0.92 (0.64, 1.19)  | > 0.50 | 0.91 (0.64, 1.18)  | > 0.50 |
| Males, BMI ( $\geq 30$ kg m <sup>-2</sup> vs. 18.5–24.9 kg m <sup>-2</sup> )                                                                               | 1.06 (0.02, 2.10)  | > 0.50 | 1.07 (0.04, 2.11)  | > 0.50 |
| Females, BMI (<18.5 kg m <sup>-2</sup> vs. 18.5–24.9 kg m <sup>-2</sup> )                                                                                  | 0.69 (-0.48, 1.86) | > 0.50 | 0.69 (-0.48, 1.86) | > 0.50 |
| Females, BMI (25–29.9 kg m <sup>-2</sup> vs. 18.5–24.9 kg m <sup>-2</sup> )                                                                                | 1.05 (0.63, 1.47)  | > 0.50 | 1.01 (0.60, 1.43)  | > 0.50 |
| Females, BMI ( $\geq 30$ kg m <sup>-2</sup> vs. 18.5–24.9 kg m <sup>-2</sup> )                                                                             | 1.12 (0.31, 1.93)  | > 0.50 | 1.08 (0.30, 1.87)  | > 0.50 |
| Males, diabetes mellitus (yes vs. no)                                                                                                                      | 1.10 (0.56, 1.64)  | > 0.50 | 1.09 (0.56, 1.62)  | > 0.50 |
| Females, diabetes mellitus (yes vs. no)                                                                                                                    | 1.17 (0.55, 1.79)  | > 0.50 | 1.18 (0.57, 1.79)  | > 0.50 |
| <i>Notes:</i> BMI, body mass index. DM, diabetes mellitus. CI, confidence interval estimated using the Wald statistics. POAG, primary open-angle glaucoma. |                    |        |                    |        |
| <sup>1</sup> <i>p</i> values of improvement in fit over the null model (with no trend in dose) are given, assessed via the Wald statistics.                |                    |        |                    |        |
| <sup>2</sup> For all workers.                                                                                                                              |                    |        |                    |        |
| <sup>3</sup> For workers with neutron exposure.                                                                                                            |                    |        |                    |        |

**Supplementary references:**

1. Kuichi, Y. *et al.* Glaucoma in atomic bomb survivors. *Radiat. Res.* **180**, 422–430 (2013)
2. Kuichi, Y. *et al.* Association between radiation, glaucoma subtype, and retinal vessel diameter in atomic bomb survivors. *Sci. Rep.* **9**, 8642 (2019)
3. Little, M.P. *et al.* Occupational radiation exposure and glaucoma and macular degeneration in the US radiologic technologists. *Sci Rep.* **8**, 10481, [https://doi.org/ 10.1038/s41598-018-28620-6](https://doi.org/10.1038/s41598-018-28620-6) (2018).
4. Preston, D., Lubin, J., Pierce, D. & McConney, M. *Epicure Users Guide*. (Hirosoft, Seattle, WA, 1993).
